# Supplementary material for: PnB Designer: a web application to design prime and base editor guide RNAs for animals and plants
Source: PubMed Central journal article supplement (PMC7923538; doi:10.1186/s12859-021-04034-6), 2021-03-02
Supplement: 12859_2021_4034_MOESM1_ESM.pdf [file 12859_2021_4034_MOESM1_ESM.pdf]

# Sup. Fig. 1

## A

pegRNA Table

| Variant           | Score | Protospacer.Sense.    | Protospacer.Antisense. | EditPos. | Extension.coding.strand.                         | PAM | PAM.Strand |
|-------------------|-------|-----------------------|------------------------|----------|--------------------------------------------------|-----|------------|
| ExampleLocus_delT | -1    | GGCCCAGACTGAGCACGTGA  | TCACGTGCTCAGTCTGGGCC   | 1        | CAGACTGAGCACG[T]GATGGCAGAGAAAGGAAGCCCTGCTTCCTCCA | TGG | Sense      |
| ExampleLocus_delT | -22   | gCTGGCCTGGGTCAATCCTTG | CAAGATTGACCCAGGCCAGC   | 22       | CCTGGGTCAATCCTTGGGGCCAGACTGAGCACG[T]GATGGCAGAGGA | GGG | Sense      |
| ExampleLocus_delT | -26   | GACGCCCTCTGGAGGAAGCA  | TGCTTCCTCCAGAGGGCGTC   | 26       | TGAGCACG[T]GATGGCAGAGAAAGGAAGCCCTGCTTCCTCCAGAGGG | GGG | Antisense  |
| ExampleLocus_delT | -27   | gCGACGCCCTCTGGAGGAAGC | GCTTCCTCCAGAGGGCGTCGC  | 27       | GAGCACG[T]GATGGCAGAGAAAGGAAGCCCTGCTTCCTCCAGAGGGC | AGG | Antisense  |
| ExampleLocus_delT | -51   | gCCTGGCCTGGGTCAATCCTT | AAGGATTGACCCAGGCCAGGC  | 23       | GCCTGGGTCAATCCTTGGGGCCAGACTGAGCACG[T]GATGGCAGAGG | GGG | Sense      |
| ExampleLocus_delT | -52   | gCCCTGGCCTGGGTCAATCCT | AGGATTGACCCAGGCCAGGGC  | 24       | GGCCTGGGTCAATCCTTGGGGCCAGACTGAGCACG[T]GATGGCAGAG | TGG | Sense      |

## B

Output Table

|   | Variant                  | Protospacer                   | EditPos. | PAM | Base.Editor      |
|---|--------------------------|-------------------------------|----------|-----|------------------|
| 1 | Example Variant C>T edit | GGCC <b>CC</b> AGAGCCTCTTTCTG | 6        | AGG | BE3-R33A         |
| 2 | Example Variant C>T edit | GG <b>CC</b> AGAGCCTCTTTCTG   | 6        | AGG | BE3 (ha3A-R128A) |
| 3 | Example Variant C>T edit | CC <b>C</b> AGAGCCTCTTTCTGAGG | 3        | AGG | Target-AID       |
