# Supplementary material for: PnB Designer: a web application to design prime and base editor guide RNAs for animals and plants
Source: PubMed Central journal article supplement (PMC7923538; doi:10.1186/s12859-021-04034-6), 2021-03-02

Sup. Fig. 2

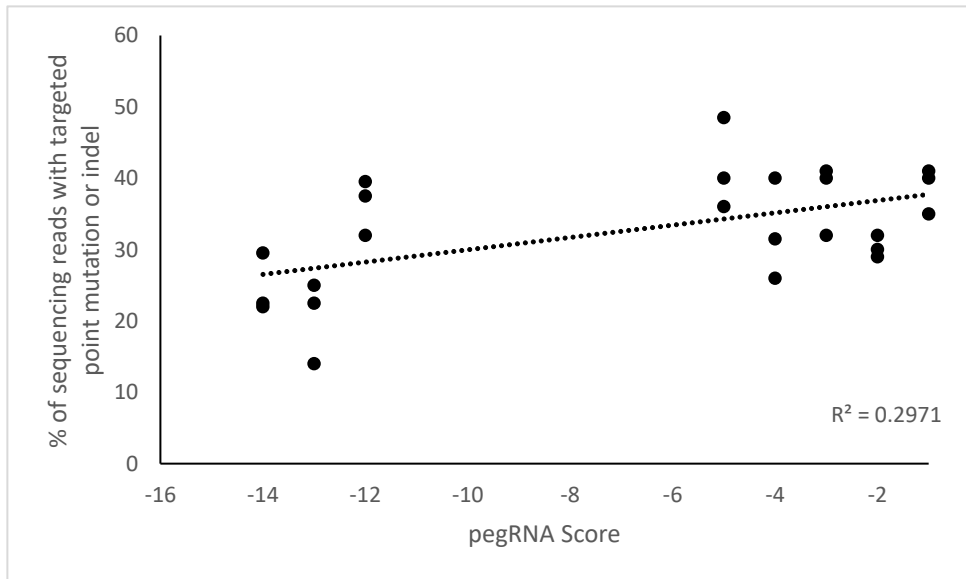

Supplement: 12859_2021_4034_MOESM2_ESM.pdf [file 12859_2021_4034_MOESM2_ESM.pdf]
